# Supplementary material for: Eye care practitioners and falls prevention: protocol for a scoping review
Source: bioRxiv or medRxiv preprint supplement (doi:10.1101/2024.04.22.24306149), 2024-04-22
Supplement: Supplementary file [file media-1.pdf]

## Supplementary File 1

### MEDLINE Literature Example Search Strategy

Database: Ovid MEDLINE(R), Ovid MEDLINE(R) In-Process & Other Non-Indexed Citations, Ovid MEDLINE(R) Daily and Ovid OLDMEDLINE(R) <1990 to Present>

#### Search Strategy:

1. (optometr\* or optic\* or ophthalmolog\* or eyecare professional or eyecare practitioner or eye care profession\* or eye care practitioner).tw.
2. Optometrists/ or optometry/ or ophthalmology/ or Ophthalmologists/
3. 1 or 2
4. fall\*.tw.
5. Accidental Falls/
6. 4 or 5
7. exp aged/ or exp geriatrics/ or exp geriatric nursing/ or (centarian\* or centenarian\* or elder\* or eldest or frail\* or geriatri\* or nonagenarian\* or octagenarian\* or octogenarian\* or old age\* or older adult\* or older age\* or older female\* or older male\* or older man or older men or older patient\* or older people or older person\* or older population or older subject\* or older woman or older women or oldest old\* or senior\* or senium or septuagenarian\* or supercentenarian\* or very old\*).tw.
8. Aged/ or "Aged, 80 and over"/
9. 7 or 8
10. 3 and 6 and 9
